# Supplementary material for: Enhancing evidence informed policymaking in complex health systems: lessons from multi-site collaborative approaches
Source: Health Res Policy Syst. 2016 Mar 17;14:20. doi: 10.1186/s12961-016-0089-0 (PMC4794922; doi:10.1186/s12961-016-0089-0)
Supplement: Additional file 1. — The adapted 4As self-assessment tool. (PDF 441 kb) [file 12961_2016_89_MOESM1_ESM.pdf]

|  |  |  |
|--|--|--|
|  |  |  |
|--|--|--|

Fortalecimiento de capacidades para la utilización de  
investigación de implementación en programas  
de salud materna

## **CUESTIONARIO DE AUTO-DIAGNÓSTICO Y GUÍA DE DISCUSIÓN**

**¿Cómo aprovechar la investigación y la información  
operativa para mejorar los programas y servicios de  
salud materna?**

### **Cuestionario Individual**

Para mayores informes, ponerse en contacto  
con la coordinación del proyecto en su país

#### **México**

Dra. Jacqueline Alcalde ([jacqueline.alcalde@insp.mx](mailto:jacqueline.alcalde@insp.mx)) / Mtro. Víctor Becerril ([victor.becerril@insp.mx](mailto:victor.becerril@insp.mx))

**Centro de Investigación en Sistemas de Salud / Instituto Nacional de Salud Pública**

#### **Nicaragua**

Dr. Miguel Ángel Orozco / Dra. Marcia Ibarra ([mibarra@cies.edu.ni](mailto:mibarra@cies.edu.ni))

**Centro para Investigación y Estudios en Salud / Universidad Nacional Autónoma de Nicaragua**

**Marzo 2014**

## CUESTIONARIO INDIVIDUAL DE AUTO-DIAGNÓSTICO

### Antecedentes

El cuestionario original de autodiagnóstico fue diseñado por la Fundación Canadiense para la Investigación en Servicios de Salud, actualmente Canadian Foundation for Healthcare Improvement. Inicialmente fue traducido y adaptado en México por el proyecto Investigación para el Desarrollo de Sistemas Estatales de Salud (INDESES) a partir de la cual se han realizado adecuaciones para ser utilizada para el proyecto de ***Fortalecimiento de capacidades para la utilización de investigación de implementación en programas de salud materna en México y Nicaragua***.

### ¿Qué es y qué le ofrece este cuestionario de auto-diagnóstico?

Este cuestionario permitirá conocer a usted y sus colaboradores la forma como se obtiene y utiliza la información **operativa y procedente de la investigación en los programas de salud materna**. La finalidad es identificar áreas de oportunidad para contribuir a mejorar procesos y resultados con el uso de evidencia procedente la investigación o la información operativa.

### Instrucciones y sugerencias para llenar el cuestionario

- Cada participante recibirá un ejemplar del cuestionario individual.
- Dentro del cuestionario se habla del “**programa**”, se refiere al “**programa de salud materna**”
- El cuestionario individual comprende dos secciones:
  - I. Datos generales del participante
  - II. Diagnóstico: incluye cuatro grupos de preguntas para explorar las capacidades de Adquisición, Análisis, Adaptación y Aplicación de evidencias científicas y operativas en salud materna
- Cada participante debe leer detenidamente las preguntas y seleccionar **sólo una respuesta** (aquella que considere más adecuada al ámbito donde trabaja).
- Los participantes deben responder todas las preguntas.
- El tiempo de aplicación del cuestionario es de 30 a 40 minutos.
- Al terminar la guía individual, el participante debe integrarse a un equipo para responder la guía de preguntas grupales.

*Fortalecimiento de capacidades para la utilización de investigación de implementación  
en Programas de Salud Materna*

## I. Datos generales del participante

1. Estado o Departamento: \_\_\_\_\_

2. Organización, institución: \_\_\_\_\_

3. Departamento / unidad / programa: \_\_\_\_\_

4. Domicilio: \_\_\_\_\_

5. Fecha de aplicación del cuestionario: \_\_\_\_\_ / \_\_\_\_\_ / \_\_\_\_\_

6. Edad \_\_\_\_\_ años

7. Sexo ☐ M ☐ F

8.

|                      |    |                         |
|----------------------|----|-------------------------|
| Grado de instrucción | 1  | Primaria incompleta     |
|                      | 2  | Primaria completa       |
|                      | 3  | Secundaria incompleta   |
|                      | 4  | Secundaria completa     |
|                      | 5  | Preparatoria incompleta |
|                      | 6  | Preparatoria completa   |
|                      | 7  | Licenciatura incompleta |
|                      | 8  | Licenciatura completa   |
|                      | 9  | Maestría incompleta     |
|                      | 10 | Maestría completa       |
|                      | 11 | Doctorado incompleto    |
|                      | 12 | Doctorado completo      |

9. Profesión \_\_\_\_\_

10. Puesto o cargo actual : \_\_\_\_\_

11. Tiempo de experiencia en el puesto actual:  años y  meses

12. Capacitación que ha recibido en los últimos dos años

| Tema de capacitación | Duración | Institución que capacitó |
|----------------------|----------|--------------------------|
|                      |          |                          |
|                      |          |                          |
|                      |          |                          |
|                      |          |                          |
|                      |          |                          |
|                      |          |                          |

## II. Diagnóstico

### A1. Adquisición

#### A1.1 Adquisición de información científica producto de investigación

#### ¿Somos capaces de adquirir resultados de investigación para nuestro programa/institución?

1. Tenemos **personal capacitado** para hacer o buscar **investigación para la toma de decisiones** en el programa/institución
  - a) No se tiene personal capacitado para hacer o buscar información de investigación.
  - b) Se dispone de al menos una persona con capacidades para hacer o buscar información.
  - c) Se dispone de un equipo de personas con capacidades para hacer o buscar investigación, pero no está formado para ello.
  - d) Se dispone de un equipo de profesionales con capacidades para hacer o buscar investigación y más de la mitad de ellos tienen maestría. .
  - e) Más del 75% del personal tiene capacidades para hacer investigación y cuenta con maestría o doctorado.
2. Nuestro personal dedica **tiempo suficiente** a la investigación para la toma de decisiones.
  - a) No dedicamos tiempo a la investigación.
  - b) Dedicamos al menos 8 horas de trabajo semanal a investigación.
  - c) Dedicamos entre 8 y 12 horas de trabajo semanal a investigación.
  - d) Dedicamos entre 12 y 20 horas de trabajo semanal a investigación.
  - e) Se dedica más de 20 horas de trabajo semanal a investigación.
3. Nuestro personal tiene **incentivos** (cursos y talleres de capacitación, asistencia a congresos, estímulos y/o compensaciones extras, etc.) **para hacer o buscar investigación** para apoyar la toma de decisiones.
  - a) No se cuenta con incentivos para hacer o buscar investigación.
  - b) Se premia únicamente en caso de que algún investigador gane un premio en otro lado
  - c) Algunas veces hemos recibido incentivos para hacer o buscar investigación.
  - d) Una o dos veces al año hemos recibido incentivos para hacer o buscar investigación.
  - e) Siempre se premia a los investigadores de acuerdo a su productividad.

*Fortalecimiento de capacidades para la utilización de investigación de implementación  
en Programas de Salud Materna*

4. Nuestro personal cuenta con **recursos** (conocimientos, financiamiento, equipo de cómputo, acceso a biblioteca, Internet, etc.) para hacer o buscar investigación para apoyar la toma de decisiones del programa/institución.
- a) No se cuenta con recursos para hacer o buscar investigación.
  - b) Se cuenta con algunos recursos para hacer o buscar investigación  
☐ con acceso limitado ☐ con acceso adecuado
  - c) Se cuenta con la mayoría de los recursos para hacer o buscar investigación  
☐ con acceso limitado ☐ con acceso adecuado
  - d) Se cuenta con recursos para hacer o buscar investigación, pero su acceso es limitado.
  - e) Se cuenta con todos los recursos para hacer o buscar investigación
5. Tenemos **convenios con expertos externos** que investigan, buscan resultados o monitorean avances de investigación para nuestros programas/institución
- a) No tenemos convenios con expertos externo en investigación
  - b) Se está en proceso para establecer convenios con expertos externos en investigación
  - c) Se tienen convenios con expertos externos en investigación por requerimiento del programa.
  - d) Se tienen convenios con expertos externos en investigación por iniciativa del equipo del programa.
  - e) Se tienen convenios permanentes con expertos externos nacionales e internacionales en investigación.

**A1.2 Adquisición de información operativa del funcionamiento de nuestro programa o institución.**

**¿Somos capaces de generar o buscar información operativa que apoye la toma de decisiones para el funcionamiento del programa/institución?**

6. Tenemos **personal capacitado** para generar o reunir información operativa para el programa/Institución
- a) No tenemos personal capacitado para generar o reunir información operativa.
  - b) Contamos con al menos una persona capacitada para generar o reunir información operativa pero no es suficiente.
  - c) Contamos con al menos una persona capacitada para generar o reunir información operativa y es suficiente.
  - d) Contamos con un equipo que genera o reúne información operativa del programa pero la información está disponible con retraso.
  - e) Contamos con un equipo que genera o reúne información operativa del programa y se

*Fortalecimiento de capacidades para la utilización de investigación de implementación  
en Programas de Salud Materna*

dispone de información oportunamente.

7. Nuestro personal dedica **tiempo suficiente** a generar o reunir información operativa de nuestro programa/institución.
  - a) No se dedica tiempo para generar o reunir información operativa.
  - b) Se dedica menos de 8 horas semanales para generar o reunir información operativa
  - c) Se dedica entre 8 a 12 horas semanales para generar o reunir información operativa
  - d) Se dedica entre 12 a 20 horas semanales para generar o reunir información operativa.
  - e) Se dedica más de 20 horas semanales para generar o reunir información operativa.
8. Nuestro personal tiene **incentivos** (cursos y talleres de capacitación, asistencia a congresos, estímulos y/o compensaciones extras, etc.) para generar o reunir información operativa del programa/institución.
  - a) No se tienen incentivos para generar o reunir información operativa.
  - b) Se reciben incentivos para generar o reunir información operativa una vez al año.
  - c) Se reciben incentivos para generar o reunir información operativa dos veces al año.
  - d) Se reciben incentivos para generar o reunir información operativa más de dos veces al año
  - e) Se reciben incentivos para generar o reunir información operativa todas las veces necesarias.
9. Nuestro personal tiene **recursos** (financiamiento, equipo de cómputo, acceso a biblioteca, Internet, etc.) para generar o reunir información operativa de nuestro programa o institución.
  - a) No se dispone de ningún recurso para generar o reunir información operativa
  - b) Se dispone de pocos recursos para generar o reunir información operativa
  - c) Se dispone de la mayoría de ellos para generar o reunir información operativa, pero el acceso es limitado.
  - d) Se dispone de la mayoría de ellos para generar o reunir información operativa y el acceso es adecuado.
  - e) Se dispone de todos los recursos para generar o reunir información operativa y el acceso es adecuado.
10. Tenemos **convenios con expertos externos** para generar o reunir información operativa de nuestro programa o institución.
  - a) No se tienen convenios con expertos externos para generar o reunir información operativa.
  - b) Se tienen convenios esporádicos con expertos externos para generar o reunir información operativa, pero son de bajo alcance

*Fortalecimiento de capacidades para la utilización de investigación de implementación  
en Programas de Salud Materna*

- c) Se tienen convenios permanentes con expertos externos para generar o reunir información, pero son de bajo alcance
- d) Se han establecido convenios permanentes con expertos externos para generar o reunir información, pero son de bajo alcance
- e) Se han establecido convenios permanentes para generar o reunir información y son de amplio alcance.

## ¿Buscamos la información en los lugares adecuados?

11. Buscamos en **revistas científicas** (por ejemplo, por suscripción, Internet, acceso a redes, bases de datos, bibliotecas).
  - a) Nunca se busca información en revistas científicas.
  - b) Se busca información sólo en revistas en las que tenemos suscripción.
  - c) Se busca información en revistas científicas nacionales independientemente de la suscripción.
  - d) Se busca información en revistas nacionales e internacionales en las que tenemos suscripción.
  - e) Se busca información en revistas nacionales e internacionales independientemente de la suscripción.
12. Buscamos en **boletines o informes** por medio de bibliotecas, acceso a Internet, envío por correo de parte de organizaciones como las instancias departamentales o estatales de salud.
  - a) Nunca se busca información en boletines o informes.
  - b) Se busca información en boletines o informes nacionales de instituciones con las que tenemos un vínculo directo
  - c) Se busca información en boletines o informes nacionales e internacionales de instituciones con las que tenemos algún vínculo.
  - d) Se busca información en boletines o informes nacionales y estatales.
  - e) Se busca información en boletines o informes nacionales e internacionales independientemente de vinculación con nuestra institución.
13. **Trabajamos con investigadores** a través de reuniones formales e informales.
  - a) Nunca trabajamos con investigadores.
  - b) Trabajamos con investigadores sólo cuando el programa lo requiere
  - c) Trabajamos con investigadores sólo cuando hay una instrucción superior
  - d) Trabajamos con investigadores de manera periódica pero su apoyo no está formalizado
  - e) Trabajamos con investigadores de manera periódica, su apoyo está formalizado

*Fortalecimiento de capacidades para la utilización de investigación de implementación  
en Programas de Salud Materna*

14. **Aprendemos de nuestros colegas** a través de redes informales o formales para intercambiar ideas, experiencias y las mejores prácticas.
- a) No se cuenta con espacios informales o formales para compartir conocimiento/experiencias con nuestros colegas.
  - b) Se comparten conocimientos/experiencias sólo con colegas cercanos.
  - c) Se comparten conocimientos y experiencias con colegas cercanos y de otras áreas.
  - d) Se comparten conocimientos/experiencias de manera constante con todo el personal.
  - f) Se comparten conocimientos y experiencias nacionales e internacionales con todo el personal.

## **A2. Análisis**

### **A2.1 Análisis de información científica producto de investigación**

#### **¿Podemos determinar si la investigación es confiable y de alta calidad?**

15. **Tenemos personal con habilidades y herramientas de análisis** para evaluar la **calidad y la confiabilidad** de la investigación.
- a) No se utiliza información procedente de investigación.
  - b) Se utiliza información de investigaciones pero no se verifica su confiabilidad.
  - c) Se utiliza información de investigaciones y se ha iniciado el proceso de verificación de su confiabilidad.
  - d) Se utiliza información procedente de investigación y se verifica su calidad y confiabilidad de manera parcial.
  - e) Se utiliza información procedente de investigación y se verifica su calidad y confiabilidad.
16. **Tenemos convenios con expertos externos** capaces de **evaluar la calidad y la confiabilidad** de la investigación que usamos para la toma de decisiones en los programas de salud materna.
- a) No se tiene contacto con expertos externos para evaluar la calidad y confiabilidad de la investigación
  - b) Se ha establecido contacto con expertos externos para evaluar la calidad y confiabilidad de la investigación, pero no hay convenio.
  - c) Se ha establecido contacto con expertos externos para evaluar la calidad y confiabilidad de la investigación, pero no hay convenio.
  - d) La información procedente de la investigación que usamos ha sido evaluada por expertos externos, pero no hay convenio.
  - e) La información procedente de la investigación que usamos ha sido evaluada por expertos externos en el marco de un convenio.

## **¿Podemos determinar si la investigación es pertinente y aplicable a nuestro programa/institución?**

17. Tenemos personal capaz de **vincular la investigación** que hacemos o que buscamos **con el programa de salud materna e identifica** similitudes y las diferencias.
- a) No se ha vinculado la investigación con el programa de salud materna.
  - b) Se han identificado algunas áreas relevantes para realizar investigación en el programa de salud materna.
  - c) Se dispone de protocolos de investigación de áreas relevantes del programa de salud materna.
  - d) Se está realizando investigación en áreas relevantes de salud materna.
  - e) Se han socializado resultados de investigación que realizó sobre el programa de salud materna.
18. Tenemos **convenios con expertos externos** para **comparar la forma en que opera el programa de salud materna contra estándares producto de la investigación**
- a) No se tiene contacto con expertos externos para hacer esta comparación.
  - b) Se ha establecido contacto con algunos expertos externos para hacer esta comparación, pero no se dispone de convenio.
  - c) Se tiene apoyo de expertos externos para hacer esta comparación, el convenio está en proceso.
  - d) Se tiene apoyo de expertos externos para hacer esta comparación y se tiene convenio firmado.
  - e) Se ha elaborado un informe de resultados de esta comparación que se realizó con apoyo de expertos externos, cooperación que está avalada en un convenio.

## **A2.2 Análisis de información operativa sobre el funcionamiento del programa de salud materna.**

### **¿Podemos determinar si la información operativa del programa de salud materna es confiable y de alta calidad?**

19. **Tenemos personal con habilidades y herramientas de análisis** para evaluar la **calidad y la confiabilidad** de la información operativa del programa de salud materna.
- a) No contamos con personal para evaluar la calidad y confiabilidad de la información operativa.
  - b) Se ha iniciado la capacitación de uno o más profesionales para evaluar la calidad y confiabilidad de la información operativa.
  - c) Se dispone de al menos un profesional capacitado que revisa la calidad y confiabilidad de la información operativa.

*Fortalecimiento de capacidades para la utilización de investigación de implementación  
en Programas de Salud Materna*

- d) Se dispone de un equipo de profesionales que revisa la calidad y confiabilidad de la información operativa, pero aún es insuficiente.
  - e) Se dispone de un equipo de profesionales suficiente para revisar la calidad y confiabilidad de la información operativa.
20. Tenemos **convenios con expertos externos** capaces de **evaluar la calidad y confiabilidad** de la información operativa que utilizamos para la toma de decisiones.
- a) No se tiene contacto con expertos externos para evaluar la calidad y confiabilidad de la información operativa
  - b) Se ha establecido contacto con algunos expertos externos para evaluar la calidad y confiabilidad de la información operativa.
  - c) Se tiene apoyo de expertos externos para evaluar la calidad y confiabilidad de la información operativa, pero no se tiene convenio.
  - d) Se ha elaborado un convenio con expertos externos para evaluar la calidad y confiabilidad de la información operativa, pero la colaboración es aún insuficiente.
  - e) Se dispone de convenios con expertos externos y se han elaborado algunos informes de evaluación de la calidad y confiabilidad de la información operativa.

**¿Podemos determinar si la información operativa del programa de salud materna es pertinente y aplicable?**

21. Tenemos personal capaz de **utilizar la información operativa** que generamos o reunimos **para evaluar el desempeño del programa de salud materna.**
- a) No se cuenta con personal capaz de evaluar el desempeño del programa con la información operativa que se genera.
  - b) Se cuenta con al menos con una persona capaz de evaluar el desempeño del programa con la información operativa que se genera pero no lo hace
  - c) Se cuenta con al menos con una persona que evalúa el desempeño del programa con la información operativa que se genera pero lo hace tardíamente.
  - d) Se cuenta con un equipo de profesionales que evalúa el desempeño del programa al menos dos veces al año.
  - e) Se cuenta con un equipo de profesionales que evalúa el desempeño del programa, lo realiza dos veces al año y socializa los resultados.
22. Tenemos **convenios con expertos externos que nos apoyan a vincular la información operativa para mejorar el desempeño del programa de salud materna.**
- a) No se tiene contacto con expertos externos para vincular la información operativa con el programa.
  - b) Se ha establecido contacto con algunos expertos externos para vincular la información operativa con el programa.
  - c) Se tiene apoyo de expertos externos para vincular la información operativa con el

*Fortalecimiento de capacidades para la utilización de investigación de implementación  
en Programas de Salud Materna*

programa y el convenio está en proceso de negociación.

- d) Se tiene convenio con expertos externos para vincular la información operativa con el programa pero no la colaboración aún no es suficiente.
- e) Se tiene convenio con expertos externos y se han establecido mecanismos de colaboración permanentes.

### **A3. Adaptación**

**¿Contamos con personal capaz de sintetizar resultados de investigación y la información operativa de forma comprensible y útil para el programa de salud materna?**

**23. Tenemos personal capaz de presentar los resultados de la investigación de manera comprensible y útil para el programa/institución.**

- a) No se tiene personal capaz de presentar resultados de investigación de manera comprensible y útil.
- b) Se tiene al menos una persona capaz de presentar resultados de investigación, pero lo hace de manera poco comprensible.
- c) Miembros del equipo de trabajo presentan resultados de investigación que sólo algunos integrantes del equipo la comprenden.
- d) Miembros del equipo de trabajo presentan resultados de investigación de manera comprensible
- e) Miembros del equipo de trabajo presentan resultados de investigación de manera comprensible y es útil para la toma de decisiones.

**24. Tenemos personal capaz de presentar la información operativa de manera comprensible y útil para nuestro programa o institución.**

- a) No se tiene personal capaz de presentar resultados de la información operativa de manera comprensible y útil.
- b) Se tiene al menos una persona capaz de presentar resultados de la información operativa, pero lo hace de manera poco comprensible.
- c) Miembros del equipo de trabajo presentan resultados de la información operativa que sólo algunos integrantes del equipo la comprenden.
- d) Miembros del equipo de trabajo presentan resultados de la información operativa de manera comprensible
- e) Miembros del equipo de trabajo presentan resultados de la información operativa de manera comprensible y es útil para la toma de decisiones.

*Fortalecimiento de capacidades para la utilización de investigación de implementación  
en Programas de Salud Materna*

**25. Tenemos personal capaz de vincular resultados de la investigación** con los problemas centrales que enfrentan nuestros **tomadores de decisiones**.

- a) No se tiene personal capaz de vincular resultados de investigación con los problemas que enfrentan los tomadores de decisiones.
- b) El personal responsable de la investigación no conoce los problemas que enfrentan los tomadores de decisiones.
- c) El personal responsable de la investigación conoce los problemas que enfrentan los tomadores de decisiones pero no hay coordinación entre ellos.
- d) El personal responsable de la investigación conoce los problemas que enfrentan los tomadores de decisiones, pero coordinan de manera esporádica.
- e) El personal responsable de la investigación conoce los problemas de salud y apoya de manera permanente a los tomadores de decisiones.

**26. Tenemos personal capaz de informar a los tomadores de decisiones sobre las acciones recomendadas por la investigación.**

- a) No se tiene personal capaz de informar a los tomadores de decisiones sobre las acciones recomendadas por la investigación.
- b) Se tiene personal responsable de investigación pero no tiene capacidad para transmitir a los tomadores de decisiones las acciones recomendadas por la investigación
- c) Se tiene personal responsable de investigación que ocasionalmente transmite a los tomadores de decisión las acciones recomendadas por la investigación.
- d) El personal responsable de investigación transmite de manera clara a los tomadores de decisiones las acciones recomendadas por la investigación.
- e) El personal responsable de investigación apoya a los tomadores de decisión a seleccionar las mejores acciones recomendadas por la investigación.

**27. Tenemos personal capaz de vincular la información operativa** con los problemas centrales que enfrentan nuestros **tomadores de decisiones**.

- a) No se tiene personal capaz de vincular resultados de la información operativa con los problemas que enfrentan los tomadores de decisiones.
- b) El personal responsable de información operativa no conoce los problemas que enfrentan los tomadores de decisiones.
- c) El personal responsable de la información operativa conoce los problemas que enfrentan los tomadores de decisiones pero no hay coordinación entre ellos.
- d) El personal responsable de la información operativa conoce los problemas que enfrentan los tomadores de decisiones, pero coordinan de manera esporádica.
- e) El personal responsable de la información operativa conoce los problemas de salud y apoya de manera permanente a los tomadores de decisiones.

**¿Cuenta el programa de salud materna con el apoyo de expertos externos que tienen habilidades para comunicar los resultados de la investigación?**

- 28. El programa de salud materna tiene acuerdos con expertos externos para presentar resultados de investigación de manera comprensible y útil?**
- a) No tenemos acuerdos con expertos externos para presentar resultados de investigación de manera comprensible y útil.
  - b) Esporádicamente establecemos acuerdos con expertos externos que presentan resultados de investigación de manera comprensible y útil.
  - c) Tenemos acuerdos con expertos externos que presentan la información de manera comprensible y útil solo cuando el programa lo requiere
  - d) Tenemos con convenios permanentes con expertos externos pero no siempre ofrecen información comprensible y útil para el programa.
  - e) Tenemos convenios permanentes con expertos externos que siempre ofrecen información y recomendaciones útiles para mejorar el programa.
- 29. El programa de salud materna tiene acuerdos con expertos externos capaces de vincular los resultados de la investigación con los problemas centrales que enfrentan nuestros tomadores de decisiones.**
- a) No se tienen acuerdos con expertos externos para vincular la investigación con los problemas que enfrentan los tomadores de decisiones.
  - b) Se tienen acuerdos con expertos externos, pero la vinculación de la investigación con los problemas que enfrentan los tomadores de decisiones no es clara.
  - c) Se tienen acuerdos con expertos externos, la vinculación de la investigación con los problemas que enfrentan los tomadores de decisiones es clara y útil pero poco frecuente.
  - d) Se tienen acuerdos con expertos externos y la vinculación de la investigación con los problemas que enfrentan los tomadores de decisiones es clara y útil pero poco frecuente.
  - e) Se tienen acuerdos con expertos externos y la investigación siempre se vincula con los problemas que enfrentan los tomadores de decisiones.
- 30. El programa tiene acuerdos con expertos externos capaces de vincular la información operativa con los problemas centrales que enfrentan los tomadores de decisiones.**
- a) No se tienen acuerdos con expertos externos para vincular la investigación con los problemas que enfrentan los tomadores de decisiones.
  - b) Se tienen acuerdos con expertos externos, pero la vinculación con los problemas que enfrentan los tomadores de decisiones no es clara.
  - c) Se tienen acuerdos con expertos externos, la vinculación con los problemas que enfrentan los tomadores de decisiones es clara y útil pero poco frecuente.
  - d) Se tienen acuerdos con expertos externos y la vinculación con los problemas que enfrentan los tomadores de decisiones es clara y útil pero poco frecuente.

*Fortalecimiento de capacidades para la utilización de investigación de implementación  
en Programas de Salud Materna*

- e) Se tienen acuerdos con expertos externos y sus resultados siempre se vinculan con claridad con los problemas que enfrentan los tomadores de decisiones.

#### A4. Aplicación

#### ¿Lideramos con el ejemplo y mostramos cuánto valoramos el uso de la investigación y la información operativa?

- 31. El **uso de resultados de investigación** es prioritario en el programa de salud materna?
  - a) Nunca se usa la investigación en el programa
  - b) Se usa la investigación sólo para hacer algunos reportes oficiales.
  - c) Se usa la investigación sólo cuando se recibe una instrucción superior.
  - d) Se usa la investigación según lo indica la metodología del programa.
  - e) Siempre se usa la investigación de manera permanente.
- 32. Nuestro programa o institución garantiza que el **personal se involucre en las decisiones del programa para el cumplimiento de metas utilizando resultados de investigación.**
  - a) El personal nunca se involucra al personal en las decisiones
  - b) El personal sólo se involucra en estas decisiones para hacer reportes oficiales.
  - c) El personal sólo se involucra en éstas decisiones cuando recibe instrucción superior
  - d) El personal se involucra en decisiones si lo indica la metodología del programa.
  - e) El personal se involucra en decisiones de manera constante.
- 33. El **uso de información operativa** es prioritario en nuestro programa o institución.
  - a) Nunca se usa información operativa.
  - b) Sólo se usa información operativa para hacer algunos reportes oficiales.
  - c) Se usa información operativa cuando se recibe una instrucción superior.
  - d) Se usa información operativa según lo indica la metodología del programa.
  - e) Siempre se usa información operativa, aunque no lo contemple el programa.
- 34. Nuestro programa o institución garantiza que el **personal se involucre en las decisiones sobre cómo se vincula la información operativa** con nuestras metas principales.
  - a) El personal nunca se involucra en estas decisiones.
  - b) El personal sólo se involucra en estas decisiones para hacer reportes oficiales.
  - c) El personal sólo se involucra en estas decisiones cuando se recibe instrucción superior.
  - d) El personal se involucra en estas decisiones si lo indica la metodología del programa.
  - e) El personal se involucra en estas decisiones de manera constante.

*Fortalecimiento de capacidades para la utilización de investigación de implementación  
en Programas de Salud Materna*

35. La **dirección** del programa/institución **comunica de forma clara las prioridades y la estrategia** de forma que quienes generan y monitorean la investigación y/o la información operativa conocen lo que se requiere para apoyar las metas.
- a) La dirección del programa nunca comunica las prioridades y estrategia a quienes generan y monitorean la investigación y/o la información operativa.
  - b) La dirección del programa comunica las prioridades y estrategia de manera poco clara.
  - c) La dirección del programa comunica las prioridades y la estrategia de manera clara pero sólo para definir la postura oficial del gobierno.
  - d) La dirección del programa comunica las prioridades y la estrategia de manera clara y constante.
  - e) La dirección del programa siempre comunica la estrategia y prioridades de manera clara, constante y útil para negociar intervenciones.
36. **Nos comunicamos internamente** garantizando el intercambio de información en el programa de salud materna
- a) No existe comunicación interna para intercambiar información
  - b) Sólo nos comunicamos para intercambiar información con los colegas más cercanos.
  - c) Existe comunicación interna esporádica entre áreas.
  - d) Se intercambia información para responder ante problemas y cuando está indicado en el programa.
  - e) Se intercambia información de manera constante aun cuando no está indicado en la metodología del programa.
37. En nuestro programa o institución **valoramos la flexibilidad, el cambio, y la mejora continua de la calidad y recompensamos con recursos** para apoyar estos valores.
- a) No se valora la flexibilidad y el cambio.
  - b) Ocasionalmente se aceptan los cambios pero no hay recompensas para apoyarlos.
  - c) Ocasionalmente se aceptan cambios y se recompensan estos esfuerzos.
  - d) Generalmente se aceptan cambios y se recompensan los esfuerzos
  - e) Existe un constante estímulo y recompensa a los cambios.

*Fortalecimiento de capacidades para la utilización de investigación de implementación  
en Programas de Salud Materna*

**¿Hay un lugar para aplicar la investigación y la información operativa en el proceso de toma de decisiones en nuestro programa o institución?**

38. A la hora de tomar decisiones importantes, normalmente reservamos **suficiente tiempo** para identificar preguntas de investigación y crear, obtener, analizar y considerar los hallazgos de la investigación.
- a) No se dispone de tiempo para identificar preguntas de investigación o sus hallazgos.
  - b) Sólo se dedica tiempo a estas actividades cuando se deben elaborar reportes oficiales.
  - c) Sólo se dedica tiempo estas actividades cuando se recibe una instrucción superior.
  - d) Sólo se dedica tiempo a estas actividades cuando lo exige la metodología del programa.
  - e) Se dedica tiempo a estas actividades de manera constante aun cuando no esté estipulado en la metodología del programa.
39. A la hora de tomar decisiones importantes, normalmente reservamos **suficiente tiempo** para revisar información operativa de nuestro programa
- a) No se reserva tiempo para revisar información operativa antes de tomar decisiones.
  - b) Sólo revisamos información operativa para elaborar reportes oficiales.
  - c) Sólo revisamos información operativa cuando se recibe una instrucción superior.
  - d) Sólo revisamos información operativa cuando lo exige la metodología del programa.
  - e) Se dedica tiempo a revisar información operativa de manera constante para tomar decisiones acertadas
40. Nuestro equipo directivo tiene **capacidad para evaluar la factibilidad** de diversas soluciones, incluyendo su impacto potencial en el desempeño del programa de salud materna.
- a) El equipo directivo no tiene capacidad para evaluar la factibilidad de diversas soluciones.
  - b) El equipo directivo tiene poca capacidad para evaluar la factibilidad de diversas soluciones.
  - c) El equipo directivo tiene capacidad para evaluar la factibilidad de diversas soluciones, pero no evalúa el impacto potencial en el desempeño del programa.
  - d) El equipo directivo tiene capacidad para evaluar la factibilidad de diversas soluciones y a veces evalúa el impacto potencial en el desempeño del programa.
  - e) El equipo directivo tiene capacidad para evaluar la factibilidad de diversas soluciones y su impacto potencial en el desempeño del programa.

*Fortalecimiento de capacidades para la utilización de investigación de implementación  
en Programas de Salud Materna*

41. Los tomadores de decisiones en nuestro programa de salud materna **consideran de manera formal cualquier recomendación** del personal que ha desarrollado o identificado investigación relevante y de alta calidad.
- a) Los tomadores de decisiones del programa no consideran las recomendaciones del personal que realiza investigación.
  - b) Los tomadores de decisiones consideran las recomendaciones del personal que realiza investigación solo para incluirla en reportes oficiales.
  - c) Los tomadores de decisiones consideran las recomendaciones del personal que realiza investigación sólo cuando hay demanda del nivel superior.
  - d) Los tomadores de decisiones consideran las recomendaciones del personal que realiza investigación solo ante un problema que se necesita resolver de inmediato.
  - e) Los tomadores de decisiones consideran las recomendaciones del personal que realiza investigación para mejorar los procesos y resultados del programa.
42. Los tomadores de decisiones en nuestro programa o institución normalmente **consideran de manera formal cualquier recomendación** del personal que maneja información operativa relevante.
- a) Los tomadores de decisiones del programa no consideran las recomendaciones del personal que maneja información operativa relevante.
  - b) Los tomadores de decisiones consideran las recomendaciones del personal que maneja información operativa relevante.sólo para incluirla en reportes oficiales.
  - c) Los tomadores de decisiones consideran las recomendaciones del personal que maneja información operativa relevante.sólo cuando hay demanda del nivel superior.
  - d) Los tomadores de decisiones consideran las recomendaciones del personal que maneja información operativa relevante.sólo ante un problema que se necesita resolver de inmediato.
  - e) Los tomadores de decisiones sí consideran las recomendaciones del personal que maneja información operativa relevante.para mejorar los procesos y resultados del programa.
43. El personal y los beneficiarios involucrados conocen **cómo y cuándo se toman las decisiones importantes en el programa de salud materna**
- a) El personal y los beneficiarios no saben cómo ni cuándo se toman las decisiones importantes en el programa
  - b) El personal y los beneficiarios ocasionalmente conocen cómo y cuándo se toman las decisiones importantes en el programa
  - c) El personal y los beneficiarios se enteran de cómo y cuándo se toman las decisiones importantes cuando lo exige la metodología del programa.
  - d) El personal y los beneficiarios se enteran de manera regular cómo y cuándo se toman las decisiones importantes ´para el programa.
  - e) El personal y los beneficiarios comparten información y se apoyan mutuamente para tomar decisiones importantes para el programa.

*Fortalecimiento de capacidades para la utilización de investigación de implementación  
en Programas de Salud Materna*

44. El personal y los beneficiarios involucrados conocen **cómo y cuándo pueden aportar evidencias científicas o información operativa y cómo serán empleadas en el programa**
- a) El personal y los beneficiarios no conocen cómo ni cuándo pueden aportar evidencias científicas o información operativa para el programa.
  - b) El personal y los beneficiarios ocasionalmente saben cómo y cuándo pueden aportar evidencias científicas o información operativa.
  - c) El personal y los beneficiarios ocasionalmente saben cómo y cuándo pueden aportar evidencias científicas o información operativa y cómo serán empleadas.
  - d) El personal y los beneficiarios saben cómo y cuándo pueden aportar evidencias científicas o información operativa y cómo serán empleadas cuando lo exige la metodología del programa.
  - e) El personal y los beneficiarios conocen regularmente cómo y cuándo pueden aportar evidencias científicas o información operativa y cómo serán empleadas.
45. El personal que aporta resultados de investigación y/o información operativa **participa en las discusiones para la toma de decisiones en el programa**
- a) Nunca participa en las discusiones para la toma de decisiones en el programa.
  - b) Sólo participa en las discusiones para la toma de decisiones cuando se elaboran reportes oficiales.
  - c) Sólo participa en las discusiones para la toma de decisiones cuando se recibe una instrucción superior.
  - d) Sólo participa en las discusiones para la toma de decisiones cuando lo exige la metodología del programa.
  - e) Siempre participa en las discusiones para la toma de decisiones del programa.
46. Los **investigadores** que forman parte del personal **participan en las discusiones para la toma de decisiones.** (No aplica si no hay investigadores).
- a) Nunca participan en las discusiones para la toma de decisiones del programa.
  - b) Sólo participan en discusiones para la toma de decisiones del programa cuando se van a elaborar reportes oficiales.
  - c) Sólo participan en discusiones para la toma de decisiones cuando se recibe una instrucción superior.
  - d) Sólo participan en discusiones para la toma de decisiones cuando lo exige la metodología del programa.
  - e) Siempre participan en discusiones para la toma de decisiones del programa.

*Fortalecimiento de capacidades para la utilización de investigación de implementación  
en Programas de Salud Materna*

47. El personal y los beneficiarios involucrados reciben **retroalimentación** en cuanto a las decisiones tomadas y su racionalidad.
- a) Nunca son retroalimentados sobre las decisiones tomadas.
  - b) Sólo ocasionalmente son retroalimentados sobre las decisiones tomadas.
  - c) Sólo son retroalimentados sobre las decisiones tomadas cuando lo exige la metodología del programa.
  - d) Generalmente son retroalimentados sobre las decisiones tomadas.
  - e) Siempre son retroalimentados sobre las decisiones tomadas.
48. **El personal y los beneficiarios** del programa reciben información sobre la influencia de las evidencias científicas y la información operativa disponibles en las opciones del programa o institución.
- a) Nunca reciben esta información.
  - b) Sólo reciben esta información cuando se debe evidenciar en los reportes oficiales.
  - c) Sólo reciben esta información cuando se recibe una instrucción superior.
  - d) Sólo reciben esta información cuando lo exige la metodología del programa.
  - e) Siempre reciben esta información.
