# Supplementary material for: Enhancing evidence informed policymaking in complex health systems: lessons from multi-site collaborative approaches
Source: Springer Nature journal article supplement (doi:10.1186/s12961-016-0089-0), 2016-03-17
Supplement: MOESM2 [file 9766080]

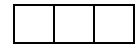

Fortalecimiento de capacidades para la utilización de  
investigación de implementación en programas  
de salud materna

Encuesta para evaluar la utilización de tecnologías de  
información y comunicación  
y elementos del proceso general del proyecto

Para mayores informes, ponerse en contacto  
con la coordinación del proyecto en su país

**México**

Dra. Jacqueline Alcalde ([jacqueline.alcalde@insp.mx](mailto:jacqueline.alcalde@insp.mx)) / Mtro. Víctor Becerril ([victor.becerril@insp.mx](mailto:victor.becerril@insp.mx))

**Centro de Investigación en Sistemas de Salud / Instituto Nacional de Salud Pública**

**Nicaragua**

Dr. Miguel Ángel Orozco / Dra. Marcia Ibarra ([mibarra@cies.edu.ni](mailto:mibarra@cies.edu.ni))

**Centro para Investigación y Estudios en Salud / Universidad Nacional Autónoma de Nicaragua**

**Enero de 2015**

*Fortalecimiento de capacidades para la utilización de investigación de implementación  
en programas de salud materna*

Este instrumento forma parte de la evaluación de procesos. Se debe aplicar al principio y al final del proyecto para detectar los cambios relacionados con el uso de tecnología de la información y la comunicación (TIC) como herramienta esencial para los procesos de comunicación, desarrollo e intercambio en las comunidades de práctica (CoP), tanto en cada estado o departamento como entre los dos países del proyecto.

### I. Datos generales del participante

1. Estado o Departamento: \_\_\_\_\_

2. Organización, institución: \_\_\_\_\_

3. Departamento / unidad / programa: \_\_\_\_\_

4. Domicilio: \_\_\_\_\_

5. Fecha de aplicación del cuestionario: \_\_\_\_/\_\_\_\_/\_\_\_\_

6. Edad  años

7. Sexo

8. Grado de instrucción

|    |                         |
|----|-------------------------|
| 1  | Primaria incompleta     |
| 2  | Primaria completa       |
| 3  | Secundaria incompleta   |
| 4  | Secundaria completa     |
| 5  | Preparatoria incompleta |
| 6  | Preparatoria completa   |
| 7  | Licenciatura incompleta |
| 8  | Licenciatura completa   |
| 9  | Maestría incompleta     |
| 10 | Maestría completa       |
| 11 | Doctorado incompleto    |
| 12 | Doctorado completo      |

9. Profesión \_\_\_\_\_

10. Puesto o cargo actual : \_\_\_\_\_

11. Tiempo de experiencia en el puesto actual:  años y  meses

*Fortalecimiento de capacidades para la utilización de investigación de implementación  
en programas de salud materna*

12. Capacitación previa que ha recibido en los últimos dos años

| <b>Tema de capacitación</b> | <b>Duración</b> | <b>Institución que capacitó</b> |
|-----------------------------|-----------------|---------------------------------|
|                             |                 |                                 |
|                             |                 |                                 |
|                             |                 |                                 |
|                             |                 |                                 |
|                             |                 |                                 |
|                             |                 |                                 |

### **SECCIÓN 1 – TICs**

(Esta primera sección del instrumento fue adaptado a partir del elaborado por Nelson Alejandro y Liusmary Ojeda de la Secretaría Académica del INSP)

#### **INSTRUCCIONES**

*Marque con un círculo la opción que corresponda para cada pregunta,  
observando que algunas pueden tener más de una respuesta*

**1. ¿Con qué frecuencia accede a Internet?**

- a. No accedo a internet (Pasar a la pregunta 7)
- b. De vez en cuando (dos o menos veces al mes)
- c. Una o dos veces a la semana
- d. Todos los días

**2. ¿En qué lugar se conecta a Internet con mayor frecuencia? (Puede marcar más de 1 opción)**

- a. Café internet
- b. Desde mi casa
- c. Desde el trabajo
- d. Otra (menciónela) \_\_\_\_\_

*Fortalecimiento de capacidades para la utilización de investigación de implementación  
en programas de salud materna*

- 3. ¿Qué tipo de conexión a Internet posee en el lugar en el que se conecta con mayor frecuencia?**
  - a. Conexión de banda ancha
  - b. Conexión telefónica
  - c. No sé
  
- 4. ¿Utiliza alguna red inalámbrica (WiFi)?**
  - a. Centro comercial
  - b. Casa
  - c. Trabajo
  - d. Universidad/Escuela
  - e. Otra, menciónela \_\_\_\_\_
  - f. No me conecto por red inalámbrica
  
- 5. ¿Navega en Internet desde su teléfono móvil?**
  - a. No
  - b. Si
  
- 6. ¿Su teléfono móvil soporta conexión a red inalámbrica (WiFi)?**
  - a. No
  - b. Si
  - c. No sé
  
- 7. ¿Cuenta con computador en su oficina?**
  - a. No
  - b. Si

**8. ¿Tiene computador portátil?**

- a. No
- b. Si

**9.Cuál de los siguientes Buscadores utiliza con mayor frecuencia?**

- a. Altavista
- b. Google
- c. Yahoo
- d. Otro (menciónelo)\_\_\_\_\_

**10. ¿Cuál de los siguientes Navegadores utiliza con mayor frecuencia?**

- a. Internet explorar
- b. Mozilla Firefox
- c. Netscape Navigator
- d. Safari
- e. Otro (menciónelo) \_\_\_\_\_

**11. ¿Cuántas cuentas de correo electrónico posee?**

- a. 1
- b. 2
- c. 3
- d. Más de 3
- e. No poseo cuenta

**12. ¿Utiliza bases de datos virtuales?**

- a. No
- b. Si

**13. ¿Utiliza repositorios de información?**

- a. No
- b. Si

**14. ¿Posee o publica en algún blog?**

- a. No
- b. Si

**15. ¿Seleccione las redes sociales donde posee usuario?**

- a. Facebook
- b. Twitter
- c. MySpace
- d. Flickr
- e. Linked In
- f. ¿Otra? Menciónela: \_\_\_\_\_

**16. ¿Tiene acceso a cámara Web?**

- a. No
- b. Si
- c. No sé

**17. Ha utilizado alguna plataforma tecnológica como apoyo en sus materias presenciales (Blackboard, Moodle, WebEx, Elluminate)**

- a. No ( Pase a la pregunta 20)
- b. Si

*Si su respuesta a la pregunta anterior es **Si** conteste las preguntas 18 y 19.*

**18. ¿Qué plataforma ha utilizado? (Puede marcar más de una opción)**

- a. Blackboard
- b. Moodle
- c. Webex

**19. ¿Considera útil el uso de estas plataformas?**

- a. No
- b. Si
- c. No sé

**20 ¿Seleccione las herramientas tecnológicas que usa para realizar sus actividades, comunicarse con sus colaboradores y/o trabajar en equipo? (marque todas las que apliquen)**

- a. Correo electrónico
- b. Messenger
- c. Skype
- d. Teléfono
- e. Wikis
- f. Google documents
- g. Redes sociales
- h. Otra (menciónela)\_\_\_\_\_

## **SECCIÓN 2 – Evaluación del proceso**

Esta sección del cuestionario tiene como objetivo que los miembros de las comunidades de práctica expresen sus puntos de vista sobre el desarrollo de todo el proyecto a fin de evaluar el proceso. Por favor responda a cada una de las preguntas basándose en su propia experiencia y percepción del trabajo desarrollado.

### **INSTRUCCIONES**

*Por favor, escriba su opinión o comentarios personales en los espacios*

- 1. ¿Qué opina usted de la CoP que se conformó para el trabajo en salud materna?**

---

---

---

---

- 2. ¿Cuáles cree usted que fueron los procesos más importantes desarrollados por la CoP?**

---

---

---

---

- 3. ¿Qué competencias y habilidades fortaleció usted como integrante la CoP?**

---

---

---

---



*Fortalecimiento de capacidades para la utilización de investigación de implementación  
en programas de salud materna*

**4. ¿Considera que aplicó las competencias desarrolladas en su trabajo diario?  
Por favor, explique cómo.**

---

---

---

---

**5. ¿Qué opina de la interacción entre investigadores y personal de los servicios  
de salud?**

---

---

---

---

**6. ¿Considera importante la presencia de un facilitador local? Explique por qué.**

---

---

---

---

**7. ¿Cuáles fueron las limitantes más importantes para su participación en la CoP?**

---

---

---

---

*Fortalecimiento de capacidades para la utilización de investigación de implementación  
en programas de salud materna*

**8. ¿Qué es lo que más valora de su experiencia de trabajo en la CoP y en el proyecto en general?**

---

---

---

---

**9. ¿Qué sugiere para mejorar el desempeño de la CoP?**

---

---

---

---
